# Supplementary material for: Harmony between spinopelvic mismatch and sagittal hip alignment contributes to upright standing in females: a cross-sectional study
Source: PubMed Central journal article supplement — J Spine Surg. 2024 Jun 14;10(2):244–54. doi: 10.21037/jss-23-145 (PMC11224792; doi:10.21037/jss-23-145), 2024-06-14
Supplement: jss-10-02-244-dss.pdf [file jss-10-02-244-dss.pdf]

## Data Sharing Statement

|                     |                                                                                                                                                     |                                                                                                                                                  |
|---------------------|-----------------------------------------------------------------------------------------------------------------------------------------------------|--------------------------------------------------------------------------------------------------------------------------------------------------|
| <b>Article Info</b> | <a href="https://dx.doi.org/10.21037/jss-23-145">https://dx.doi.org/10.21037/jss-23-145</a>                                                         |                                                                                                                                                  |
| <b>Item</b>         | <b>Question</b>                                                                                                                                     | <b>Authors' Response<br/>(place "-" if not applicable)</b>                                                                                       |
| 1                   | Would you like to share data collected for your study to others?                                                                                    | -                                                                                                                                                |
| 2                   | If not, would you like to share the reason for your decision?                                                                                       | We have not applied to the ethics committee for permission to submit data to other institutions for purposes other than the creation of a paper. |
| 3                   | What data in particular will be shared?                                                                                                             | -                                                                                                                                                |
| 4                   | Any other documents will be shared? Such as study protocol, statistical analysis plan, informed consent form, clinical study report, analytic code. | -                                                                                                                                                |
| 5                   | When will data availability begin?                                                                                                                  | -                                                                                                                                                |
| 6                   | When will data availability end?                                                                                                                    | -                                                                                                                                                |
| 7                   | To whom will you share the data?                                                                                                                    | -                                                                                                                                                |
| 8                   | For what type of analysis or purpose?                                                                                                               | -                                                                                                                                                |
| 9                   | How or where can the data/documents be obtained?                                                                                                    | -                                                                                                                                                |
| 10                  | Any other restrictions?                                                                                                                             | -                                                                                                                                                |
